# Supplementary material for: Simulating the radiative forcing of oceanic dimethylsulfide (DMS) in Asia based on Machine learning estimates
Source: Copernicus journal article supplement (doi:10.5194/acp-2022-3), 2022-03-22
Supplement: Supplementary file 2 [file acp-2022-3-supplement.pdf]

1 *Supplement of*

2 **Simulating the radiative forcing of oceanic dimethylsulfide (DMS) in Asia based on Machine learning**  
3 **estimates**

4

5

6 **Junri Zhao et al.**

7 *Correspondence to: Yan Zhang (yan\_zhang@fudan.edu.cn)*

8

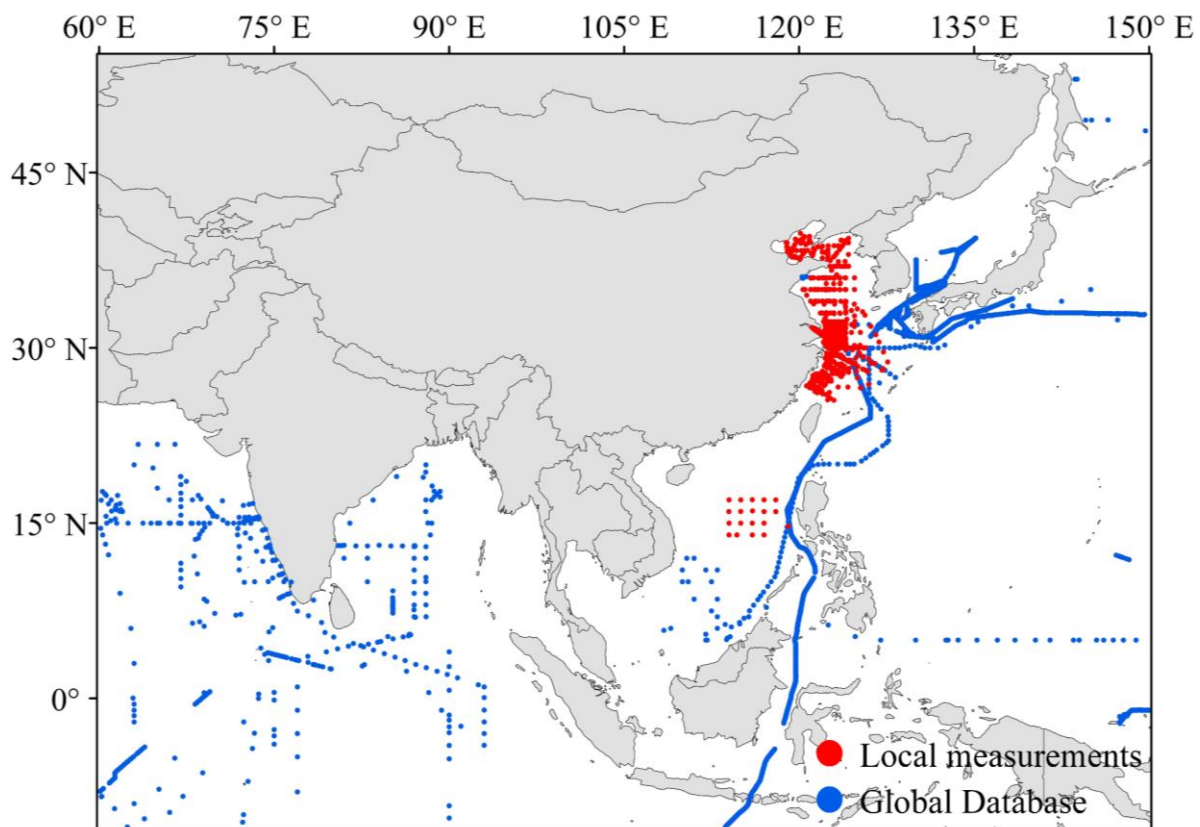

9

10 **Figure S1.** Spatial distribution of DMS measurements in simulation domain (11°S to 55°N, 60–150°E).

11

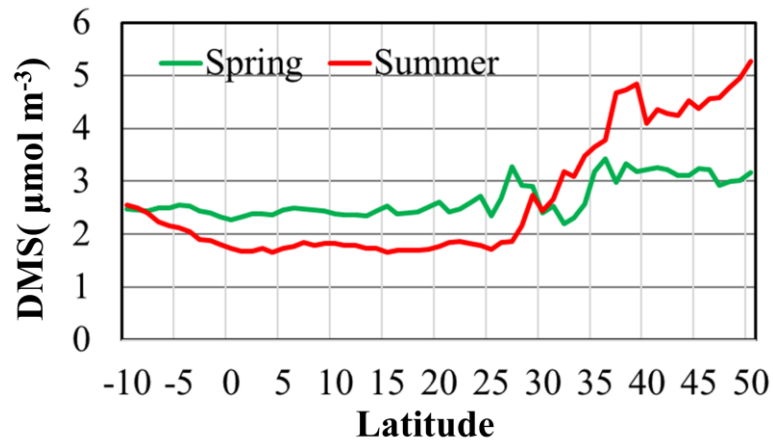

12

13 **Figure S2.** Zonal mean DMS sea-surface concentrations predicted by XGBoost between -10 to 50° latitude band of  
 14 entire simulation domain (11°S to 55°N, 60–150°E).

15

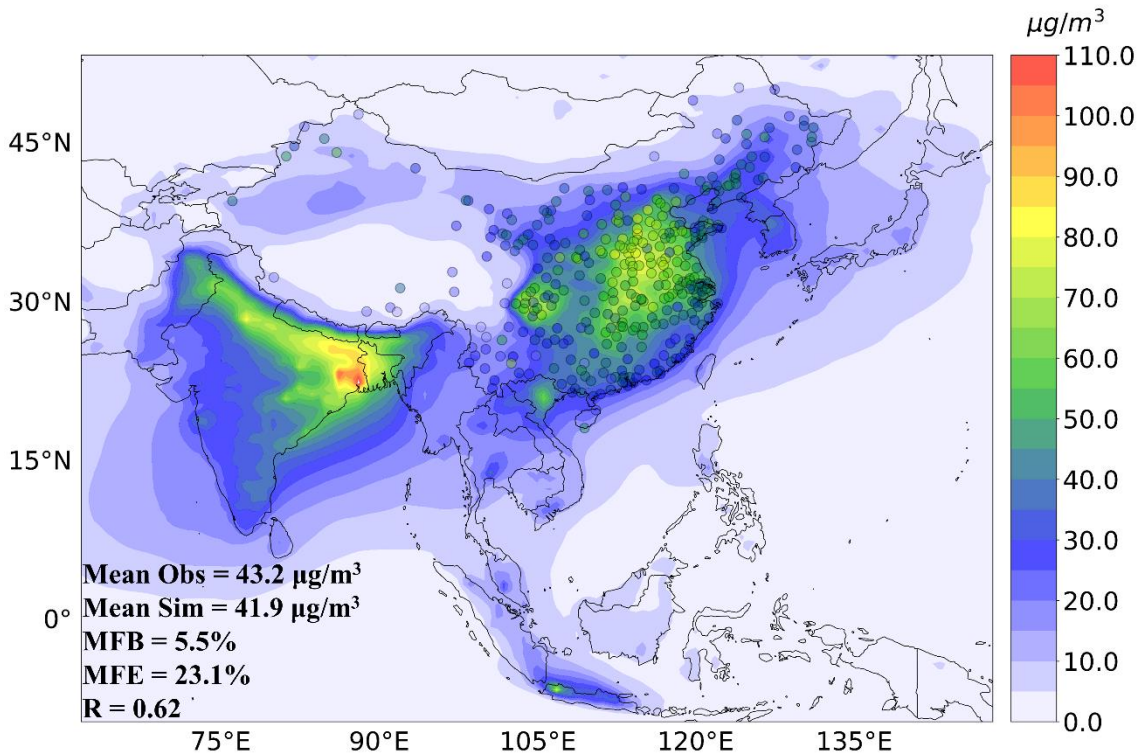

16

17 **Figure S3.** Spatial plots of annual mean concentrations from XG simulation (background plots) and observed (circles)  
 18 values of  $\text{PM}_{2.5}$ . The mean observation (Mean Obs), mean simulation (Mean Sim), mean fractional error (MFE), and  
 19 mean fractional bias (MFB) displayed at lower left corner are the statistic result of averaged 365 grids.

20

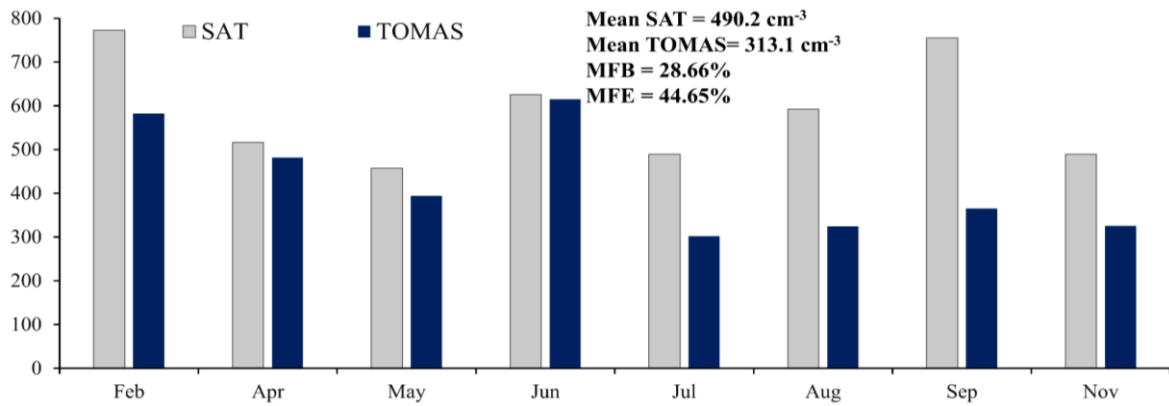

21

22 **Figure S4.** Monthly mean simulated CCN concentrations (TOMAS) from XG simulation and satellite-retrieved CCN  
 23 concentrations (SAT) from Liu et al., (2020). The mean satellite-retrieved (Mean SAT) CCN concentrations, mean  
 24 simulation (Mean TOMAS), mean fractional error (MFE), and mean fractional bias (MFB) displayed at upper centre  
 25 are the statistic result of averaged on the simulation grid for corresponding satellite-retrieved CCN geographical  
 26 location (in total 667 grids).

27

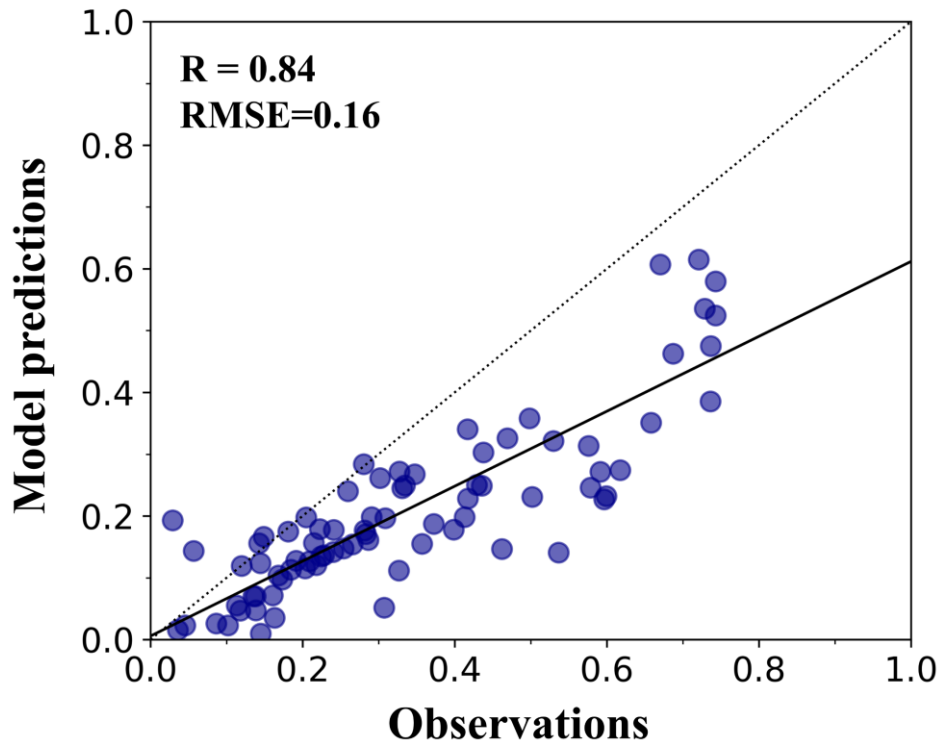

28

29 **Figure S5.** The scatter plot of AOD compares annual mean model predictions (XG simulation) and observations from  
 30 AERONET. The black solid line and dashed line indicate trendline and 1:1 line, respectively.

31

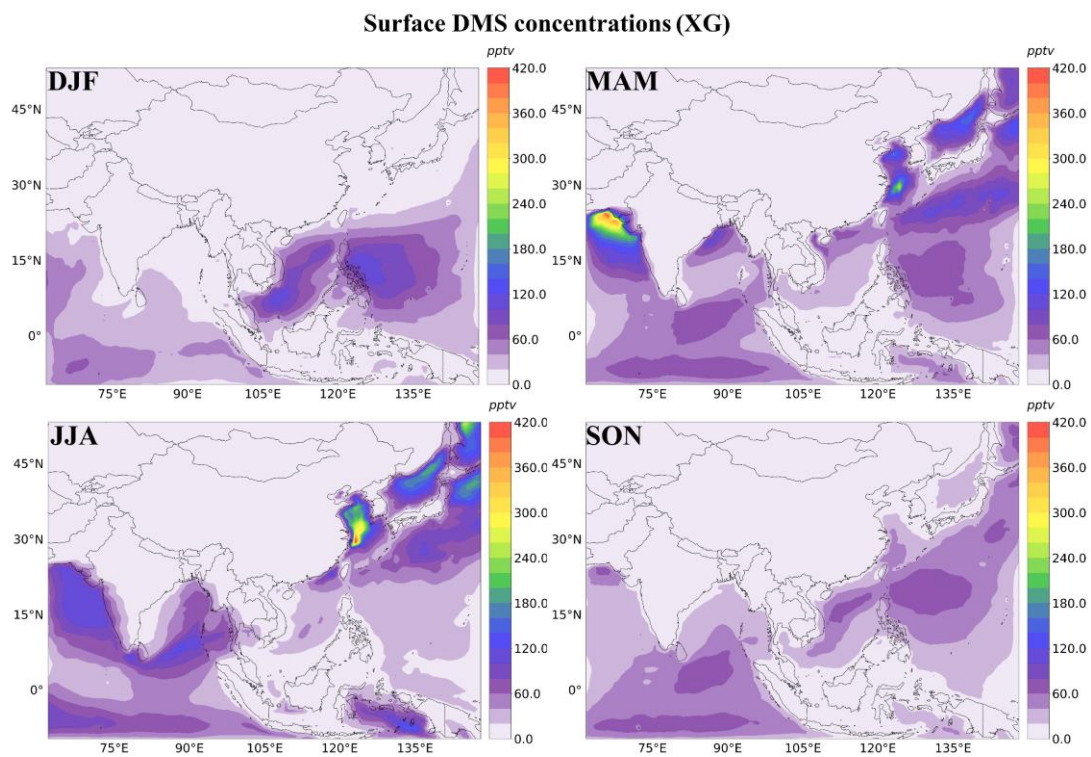

33

34 **Figure S6.** Seasonal variations of atmospheric surface DMS concentrations estimated by the XG simulation.

35



Absolute contribution of DMS to SO<sub>2</sub> (XG – ND)

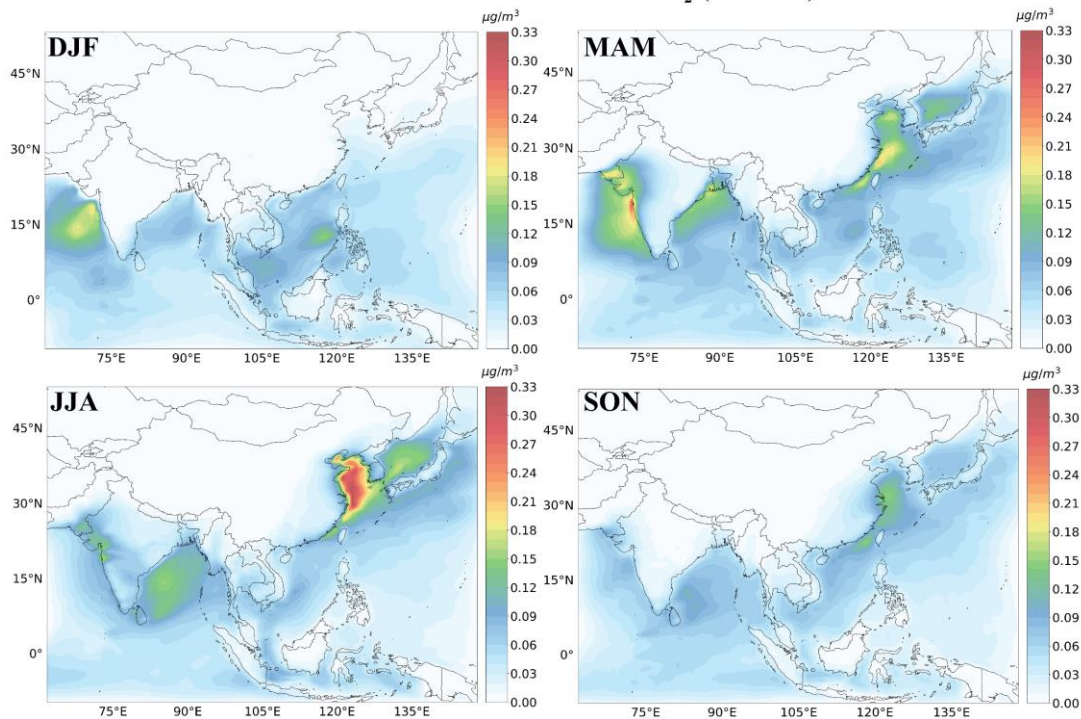

36

37 **Figure S7.** Seasonal variations of absolute changes in surface SO<sub>2</sub> between the XG and ND (no DMS) simulations.

38

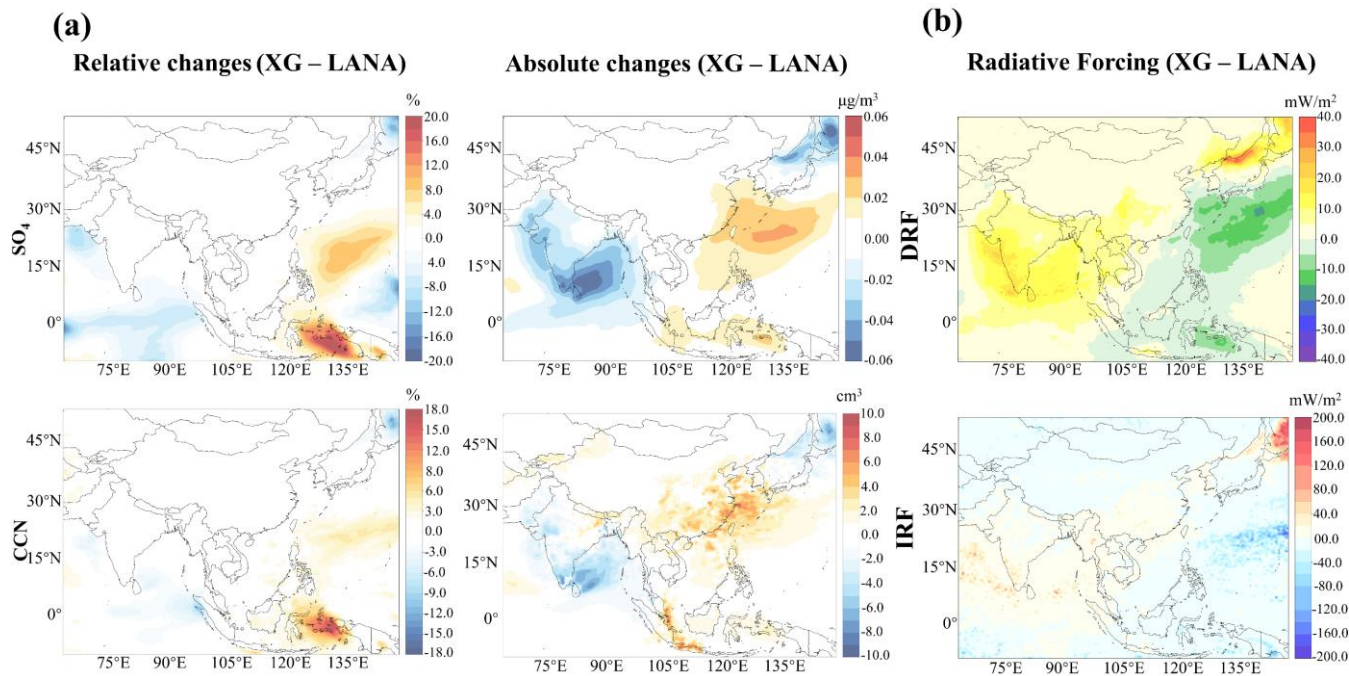

39

40 **Figure S8.** Panel (a) presents the spatial distributions of annual mean percent changes and absolute changes in surface  $\text{SO}_4^{2-}$   
 41 and CCN, and panel (b) presents the spatial distributions of annual mean all-sky DRF and cloud-albedo IRF between the XG  
 42 and LANA simulations.

43  
 44

45 **Table S1.** Training dataset participated in machine learning estimates

| Variables                                       | units                                  | Filtering threshold                                    | sources                                                                                                                                           |
|-------------------------------------------------|----------------------------------------|--------------------------------------------------------|---------------------------------------------------------------------------------------------------------------------------------------------------|
| DMS measurements in China Seas                  | $\mu\text{mol m}^{-3}$                 | Remove values $< 0.1$ and values $> 100$               | Local measurements from Ocean University of China (Yang et al., 2015a; Yang et al., 2014; Yang et al., 2015b; Li et al., 2020b; Li et al., 2020a) |
| DMS measurements from global database           | $\mu\text{mol m}^{-3}$                 | Remove values $< 0.1$ and values $> 100$               | <a href="http://saga.pmel.noaa.gov/dms/">http://saga.pmel.noaa.gov/dms/</a> (Kettle et al., 1999; Lana et al., 2011)                              |
| Salinity                                        | unitless                               | Remove values $< 30$ and sampling depth $> 10\text{m}$ | <a href="https://www.ncei.noaa.gov/products/world-ocean-atlas">https://www.ncei.noaa.gov/products/world-ocean-atlas</a> (Garcia et al., 2019)     |
| Sea surface temperature (SST)                   | $^{\circ}\text{C}$                     | -                                                      | <a href="https://www.ncei.noaa.gov/products/world-ocean-atlas">https://www.ncei.noaa.gov/products/world-ocean-atlas</a> (Garcia et al., 2019)     |
| Dissolved Oxygen (DO)                           | $\mu\text{mol kg}^{-1}$                | Remove values $< 0.01$                                 | <a href="https://www.ncei.noaa.gov/products/world-ocean-atlas">https://www.ncei.noaa.gov/products/world-ocean-atlas</a> (Garcia et al., 2019)     |
| Silicate                                        | $\mu\text{mol kg}^{-1}$                | Remove values $< 0.01$                                 | <a href="https://www.ncei.noaa.gov/products/world-ocean-atlas">https://www.ncei.noaa.gov/products/world-ocean-atlas</a> (Garcia et al., 2019)     |
| Phosphate                                       | $\mu\text{mol kg}^{-1}$                | Remove values $< 0.01$                                 | <a href="https://www.ncei.noaa.gov/products/world-ocean-atlas">https://www.ncei.noaa.gov/products/world-ocean-atlas</a> (Garcia et al., 2019)     |
| Nitrate                                         | $\mu\text{mol kg}^{-1}$                | Remove values $< 0.01$                                 | <a href="https://www.ncei.noaa.gov/products/world-ocean-atlas">https://www.ncei.noaa.gov/products/world-ocean-atlas</a> (Garcia et al., 2019)     |
| Mixed layer depth (MLD)                         | m                                      | Remove values $> 150$                                  | <a href="https://www.pmel.noaa.gov/mimoc/">https://www.pmel.noaa.gov/mimoc/</a> (Schmidtko et al., 2013)                                          |
| Chlorophyll concentration (Chl)                 | $\text{mg m}^{-3}$                     | Remove values $< 0.01$                                 | <a href="https://oceancolor.gsfc.nasa.gov/l3">https://oceancolor.gsfc.nasa.gov/l3</a>                                                             |
| Diffuse attenuation coefficient at 490m (kd490) | $\text{m}^{-1}$                        | -                                                      | <a href="https://oceancolor.gsfc.nasa.gov/l3">https://oceancolor.gsfc.nasa.gov/l3</a>                                                             |
| Particulate Inorganic Carbon (PIC)              | $\text{mg m}^{-3}$                     | -                                                      | <a href="https://oceancolor.gsfc.nasa.gov/l3">https://oceancolor.gsfc.nasa.gov/l3</a>                                                             |
| Particulate organic Carbon (POC)                | $\text{mg m}^{-3}$                     | -                                                      | <a href="https://oceancolor.gsfc.nasa.gov/l3">https://oceancolor.gsfc.nasa.gov/l3</a>                                                             |
| Photosynthetically available Radiation (PAR)    | Einstein $\text{m}^{-2} \text{d}^{-1}$ | -                                                      | <a href="https://oceancolor.gsfc.nasa.gov/atbd/par/">https://oceancolor.gsfc.nasa.gov/atbd/par/</a>                                               |

46

47 **Table S2.** Comparison of seasonal mean DMS concentrations over Asia region from other studies ( $\mu\text{mol m}^{-3}$ )

| Season | This study | Lana et al. (2011) | Wang et al. (2020) |
|--------|------------|--------------------|--------------------|
| Winter | 1.93       | 1.78               | 1.30               |

|        |      |      |      |
|--------|------|------|------|
| Spring | 2.52 | 2.33 | 2.21 |
| Summer | 2.19 | 2.01 | 1.81 |
| Fall   | 2.03 | 1.87 | 1.71 |

48

49 **Table S3.** Comparison of regional mean modelled atmospheric DMS concentrations with observations from Cruise Survey  
50 Experiment (CSE) 1-3(Units: pptv).

|          | CSE 1  | CSE 2  | CSE 3   |
|----------|--------|--------|---------|
| OBS      | 39.74  | 57.82  | 217.51  |
| XG       | 46.42  | 41.65  | 334.90  |
| LANA     | 23.40  | 36.71  | 95.94   |
| OBS-XG   | 6.68   | -16.17 | 117.39  |
| OBS-LANA | -16.34 | -21.11 | -121.57 |

51 **Notes:** OBS refer to observations; XG and LANA refer to simulation values; OBS-XG and OBS-LANA refer to differences between  
52 observations and simulation values (XG and LANA).

53

54 **Table S4.** Comparison of mean annual CCN predictions from other studies (Units:  $\text{cm}^{-3}$ )

| City                | Longitude | Latitude | CCN_obs | CCN_sim | Sources                     |
|---------------------|-----------|----------|---------|---------|-----------------------------|
| Nanjing             | 118.7°E   | 32.06°N  | 1540.5  | 919.1   | (Liu et al., 2020)          |
| Nanjing             | 118.7°E   | 32.21°N  | 1669.2  | 994.3   | (Liu et al., 2020)          |
| Shanghai            | 121.29°E  | 31.18°N  | 2783.0  | 983.3   | (Liu et al., 2020)          |
| Guangzhou           | 113.21°E  | 23.07°N  | 1299.3  | 796.9   | (Liu et al., 2020)          |
| Shenzhen            | 114.56°E  | 22.48°N  | 1289.0  | 501.9   | (Liu et al., 2020)          |
| Taiwan              | 121.54°E  | 25.3°N   | 1010.5  | 325.4   | (Cheung et al., 2020)       |
| Indo-Gangetic Plain | 85.81°E   | 20.24°N  | 2250.0  | 948.7   | (Jayachandran et al., 2020) |
| Indo-Gangetic Plain | 82.85°E   | 25.45°N  | 1650.0  | 1432.4  | (Jayachandran et al., 2020) |
| Indo-Gangetic Plain | 73.04°E   | 26.25°N  | 1375.0  | 602.2   | (Jayachandran et al., 2020) |
| Eastern Himalaya    | 88.2°E    | 27°N     | 1800.0  | 1787.7  | (Roy et al., 2017)          |
| Central Himalaya    | 79.5°E    | 29.4°N   | 1000.0  | 1232.0  | (Dumka et al., 2015)        |

|               |         |         |        |        |                         |
|---------------|---------|---------|--------|--------|-------------------------|
| Hyderabad     | 78.38°E | 17.45°N | 1100.0 | 1564.2 | (Varghese et al., 2016) |
| Mahabaleshwar | 73.4°E  | 17.6°N  | 1500.0 | 670.0  | (Leena et al., 2016)    |

55

56 **Table S5.** Comparison of modelled annual mean DRF and IRF for DMS induced sulfate reported in previous studies.

| Annual Mean DRF ( $W m^{-2}$ ) | Annual Mean IRF ( $W m^{-2}$ ) | Model                                         | Sources                |
|--------------------------------|--------------------------------|-----------------------------------------------|------------------------|
| -0.23                          | -0.76                          | GLOMAP-mode global aerosol microphysics model | (Rap et al., 2013)     |
| -0.074                         | -0.23                          | CESM-CAM5                                     | (Yang et al., 2017)    |
| --                             | -6.55                          | CESM-CAM5                                     | (Jin et al., 2018)     |
| --                             | -2.0                           | ECHAM5-HAMMOZ                                 | (Thomas et al., 2010)  |
| --                             | -1.79                          | ECHAM5-HAMMOZ                                 | (Mahajan et al., 2015) |

57 **Notes:** -- represents corresponding values that have not reported in their studies.

58

59 **References:**

- 60 Cheung, H. C., Chou, C. C. K., Lee, C. S. L., Kuo, W. C., and Chang, S. C.: Hygroscopic properties and cloud condensation  
61 nuclei activity of atmospheric aerosols under the influences of Asian continental outflow and new particle formation at a  
62 coastal site in eastern Asia, *Atmos. Chem. Phys.*, 20, 5911-5922, 10.5194/acp-20-5911-2020, 2020.
- 63 Dumka, U. C., Bhattu, D., Tripathi, S. N., Kaskaoutis, D. G., and Madhavan, B. L.: Seasonal inhomogeneity in cloud  
64 precursors over Gangetic Himalayan region during GVAX campaign, *Atmospheric Research*, 155, 158-175,  
65 <https://doi.org/10.1016/j.atmosres.2014.11.022>, 2015.
- 66 Jayachandran, V. N., Suresh Babu, S. N., Vaishya, A., Gogoi, M. M., Nair, V. S., Satheesh, S. K., and Krishna Moorthy, K.:  
67 Altitude profiles of cloud condensation nuclei characteristics across the Indo-Gangetic Plain prior to the onset of the Indian  
68 summer monsoon, *Atmos. Chem. Phys.*, 20, 561-576, 10.5194/acp-20-561-2020, 2020.
- 69 Jin, Q., Grandey, B. S., Rothenberg, D., Avramov, A., and Wang, C.: Impacts on cloud radiative effects induced by  
70 coexisting aerosols converted from international shipping and maritime DMS emissions, *Atmos. Chem. Phys.*, 18, 16793-  
71 16808, 10.5194/acp-18-16793-2018, 2018.
- 72 Kettle, A. J., Andreae, M. O., Amouroux, D., Andreae, T. W., Bates, T. S., Berresheim, H., Bingemer, H., Boniforti, R.,  
73 Curran, M. A. J., DiTullio, G. R., Helas, G., Jones, G. B., Keller, M. D., Kiene, R. P., Leck, C., Lévassieur, M., Malin, G.,  
74 Maspero, M., Matrai, P., McTaggart, A. R., Mihalopoulos, N., Nguyen, B. C., Novo, A., Putaud, J. P., Rapsomanikis, S.,  
75 Roberts, G., Schebeske, G., Sharma, S., Simó, R., Staubes, R., Turner, S., and Uher, G.: A global database of sea surface  
76 dimethylsulfide (DMS) measurements and a procedure to predict sea surface DMS as a function of latitude, longitude, and  
77 month, *Global Biogeochemical Cycles*, 13, 399-444, 10.1029/1999GB900004, 1999.
- 78 Lana, A., Bell, T. G., Simó, R., Vallina, S. M., Ballabrera-Poy, J., Kettle, A. J., Dachs, J., Bopp, L., Saltzman, E. S., Stefels,  
79 J., Johnson, J. E., and Liss, P. S.: An updated climatology of surface dimethylsulfide concentrations and emission fluxes in  
80 the global ocean, *Global Biogeochemical Cycles*, 25, 10.1029/2010GB003850, 2011.
- 81 Leena, P. P., Pandithurai, G., Anilkumar, V., Murugavel, P., Sonbawne, S. M., and Dani, K. K.: Seasonal variability in  
82 aerosol, CCN and their relationship observed at a high altitude site in Western Ghats, *Meteorology and Atmospheric Physics*,  
83 128, 143-153, 10.1007/s00703-015-0406-0, 2016.



84 Li, S., Sarwar, G., Zhao, J., Zhang, Y., Zhou, S., Chen, Y., Yang, G., and Saiz-Lopez, A.: Modeling the Impact of Marine  
85 DMS Emissions on Summertime Air Quality Over the Coastal East China Seas, *Earth and Space Science*, 7,  
86 e2020EA001220, <https://doi.org/10.1029/2020EA001220>, 2020a.

87 Li, S., Zhang, Y., Zhao, J., Sarwar, G., Zhou, S., Chen, Y., Yang, G., and Saiz-Lopez, A.: Regional and Urban-Scale  
88 Environmental Influences of Oceanic DMS Emissions over Coastal China Seas, *Atmosphere*, 11, 10.3390/atmos11080849,  
89 2020b.

90 Liu, C., Wang, T., Rosenfeld, D., Zhu, Y., Yue, Z., Yu, X., Xie, X., Li, S., Zhuang, B., Cheng, T., and Niu, S.:  
91 Anthropogenic Effects on Cloud Condensation Nuclei Distribution and Rain Initiation in East Asia, *Geophysical Research*  
92 *Letters*, 47, e2019GL086184, <https://doi.org/10.1029/2019GL086184>, 2020.

93 Mahajan, A. S., Fadnavis, S., Thomas, M. A., Pozzoli, L., Gupta, S., Royer, S.-J., Saiz-Lopez, A., and Simó, R.: Quantifying  
94 the impacts of an updated global dimethyl sulfide climatology on cloud microphysics and aerosol radiative forcing, *Journal*  
95 *of Geophysical Research: Atmospheres*, 120, 2524-2536, <https://doi.org/10.1002/2014JD022687>, 2015.

96 Rap, A., Scott, C. E., Spracklen, D. V., Bellouin, N., Forster, P. M., Carslaw, K. S., Schmidt, A., and Mann, G.: Natural  
97 aerosol direct and indirect radiative effects, *Geophysical Research Letters*, 40, 3297-3301, <https://doi.org/10.1002/grl.50441>,  
98 2013.

99 Roy, A., Chatterjee, A., Sarkar, C., Das, S. K., Ghosh, S. K., and Raha, S.: A study on aerosol-cloud condensation nuclei  
100 (CCN) activation over eastern Himalaya in India, *Atmospheric Research*, 189, 69-81,  
101 <https://doi.org/10.1016/j.atmosres.2017.01.015>, 2017.

102 Schmidtko, S., Johnson, G. C., and Lyman, J. M.: MIMOC: A global monthly isopycnal upper-ocean climatology with  
103 mixed layers, *Journal of Geophysical Research: Oceans*, 118, 1658-1672, <https://doi.org/10.1002/jgrc.20122>, 2013.

104 Thomas, M. A., Suntharalingam, P., Pozzoli, L., Rast, S., Devasthale, A., Kloster, S., Feichter, J., and Lenton, T. M.:  
105 Quantification of DMS aerosol-cloud-climate interactions using the ECHAM5-HAMMOZ model in a current climate  
106 scenario, *Atmos. Chem. Phys.*, 10, 7425-7438, 10.5194/acp-10-7425-2010, 2010.

107 Varghese, M., Prabha, T. V., Malap, N., Resmi, E. A., Murugavel, P., Safai, P. D., Axisa, D., Pandithurai, G., and Dani, K.:  
108 Airborne and ground based CCN spectral characteristics: Inferences from CAIPEEX – 2011, *Atmospheric Environment*, 125,  
109 324-336, <https://doi.org/10.1016/j.atmosenv.2015.06.041>, 2016.

110 Wang, W. L., Song, G., Primeau, F., Saltzman, E. S., Bell, T. G., and Moore, J. K.: Global ocean dimethyl sulfide  
111 climatology estimated from observations and an artificial neural network, *Biogeosciences*, 17, 5335-5354, 10.5194/bg-17-  
112 5335-2020, 2020.

113 Yang, G.-P., Song, Y.-Z., Zhang, H.-H., Li, C.-X., and Wu, G.-W.: Seasonal variation and biogeochemical cycling of  
114 dimethylsulfide (DMS) and dimethylsulfoniopropionate (DMSP) in the Yellow Sea and Bohai Sea, *Journal of Geophysical*  
115 *Research: Oceans*, 119, 8897-8915, <https://doi.org/10.1002/2014JC010373>, 2014.

116 Yang, G.-P., Zhang, S.-H., Zhang, H.-H., Yang, J., and Liu, C.-Y.: Distribution of biogenic sulfur in the Bohai Sea and  
117 northern Yellow Sea and its contribution to atmospheric sulfate aerosol in the late fall, *Marine Chemistry*, 169, 23-32,  
118 <https://doi.org/10.1016/j.marchem.2014.12.008>, 2015a.

119 Yang, J., Yang, G., Zhang, H., and Zhang, S.: Spatial distribution of dimethylsulfide and dimethylsulfoniopropionate in the  
120 Yellow Sea and Bohai Sea during summer, *Chinese Journal of Oceanology and Limnology*, 33, 1020-1038, 10.1007/s00343-  
121 015-4188-5, 2015b.

122 Yang, Y., Wang, H., Smith, S. J., Easter, R., Ma, P. L., Qian, Y., Yu, H., Li, C., and Rasch, P. J.: Global source attribution of  
123 sulfate concentration and direct and indirect radiative forcing, *Atmos. Chem. Phys.*, 17, 8903-8922, 10.5194/acp-17-8903-  
124 2017, 2017.

125
