# Supplementary material for: Simulating the radiative forcing of oceanic dimethylsulfide (DMS) in Asia based on Machine learning estimates
Source: Copernicus journal article supplement (doi:10.5194/acp-2022-3), 2022-03-22
Supplement: Supplementary file [file acp-2022-3-AC2-supplement.pdf]

---

## Responses to reviewers' comments

We appreciate the reviewers' careful and thoughtful comments of our manuscript entitled "*Simulating the radiative forcing of oceanic dimethylsulfide (DMS) in Asia based on Machine learning estimates*" and for the many helpful suggestions to improve the article. We have carefully reviewed all comments and revised the article accordingly. The sentences are depicted in yellow in the manuscript text to highlight the new addition and used strikethrough for deletion. To be clear, all the responses are in green background in the below.

### Responses to Reviewer 2 comments:

1. The authors need to explain in more detail why they chose the XGBoost model instead of a different ML model and should give further details on the performance of this approach, both at training and at validation, rather than only Pearson's coefficient and RMSE, especially when the RMSE is of the same order of magnitude as the predicted concentrations. I would have liked to see other performance metrics as well, such as relative errors.

#### Answer:

Thanks for your suggestions. As reviewer suggested, we have added Table S2 in the supplemental information which illustrated other performance metrics for DMS predictions in each season, and also added to the second paragraph of section 2.3 that "*Model performance for predicting DMS concentration in each season was illustrated Table S2. Predicted DMS concentrations were slightly underestimated in comparison with validation datasets, with mean bias (MB) of -0.59 to -0.21  $\mu\text{mol m}^{-3}$  and normalized mean bias (NMB) of -19.36 to -6.51% across the four seasons. A lower RMSE of 1.81  $\mu\text{mol m}^{-3}$  was observed in spring. The MB and NMB in spring were smaller than those in other seasons, which indicated that model performed best in spring. Most of available validation datasets were concentrated in the spring (about 67.9%). Thus, the imbalanced data may led to less ideal performance in other seasons.*"

---

The reason why we chose the XGBoost model, due to its advantages of scalability, computing efficiency and prediction accuracy, and robust to randomness, it has also been widely used in geoscience, predictions of atmospheric composition, and other areas (Sun et al., 2021; Ivatt and Evans, 2020; Qian et al., 2020; Zhang et al., 2019; Silva et al., 2022; Cao et al., 2021). Some studies also showed that XGBoost consistently outperforms other ML algorithms (Zamani Joharestani et al., 2019; Pan, 2018). Among the ML approaches, some deep learning techniques tend to require larger amounts of training data to make reasonable predictions, whereas Xgboost is good for tabular data with a small number of variables (Qian et al., 2020; Shwartz-Ziv and Armon, 2022). In our study, the total number of training samples is 2939, thus, we believe that ML model like XGBoost requiring small training data sets is preferred in our DMS concentration predicting experiments. So, we selected XGBoost model to estimate DMS concentrations.

We also added the introduction of advantages of XGBoost in updated section 2.3 that *“XGBoost (machine learning algorithm under the Gradient Boosting framework) was used due to its many advantages. For example, XGBoost is computationally efficiency, has prediction accuracy, requires less tuning, and is scalable, has been widely used in area of geoscience (Sun et al., 2021; Ivatt and Evans, 2020; Pan, 2018; Qian et al., 2020; Silva et al., 2022; Cao et al., 2021), and generally outperformed other models. Moreover, Xgboost is good for tabular data and does not require large training datasets (Shwartz-Ziv and Armon, 2022). Thus, to better capture the nonlinear relationship between DMS and the parameters that influence it, we trained an XGBoost model with the entire dataset to predict sea surface DMS concentrations where without the observations in the place of missing observations”*.

2. I am also puzzled by the high correlation coefficient and small RMSE in Figure S5, where observations are compared against model predictions for AOD. It is clear that the points are not around the 1:1 line (it looks like that the slope of the fitted straight line is of the order of 0.6). How can R be 0.84 then?? Can the calculations be rechecked please?

**Answer:**

We have rechecked data extraction and calculation process and regenerated the Figure S5(Figure S6 now), and the results showed that the correlation coefficient R is indeed equal to 0.84 ( $R^2=0.7094$ ), and please see the below table for the original data with 78 data points, which there were 79 data points included in Figure S5 (now is Figure S6) before revision. The equation for the fitted line is updated from  $y=0.6x+0.0057$  to  $y=0.57x+0.0151$ , the MB and RMSE are changed from 0.123 and 0.164 to 0.128 and 0.169. All the descriptions have been revised accordingly in section 3.2.2.

**Table 1.** Comparison of annual mean modelled AOD concentrations with observations.

| aod_sim  | aod_obs  |
|----------|----------|
| 0.198019 | 0.413011 |
| 0.055318 | 0.113226 |
| 0.071594 | 0.160666 |
| 0.111674 | 0.326399 |
| 0.025943 | 0.08624  |
| 0.046879 | 0.117806 |
| 0.070258 | 0.135001 |
| 0.161068 | 0.286322 |
| 0.070329 | 0.137849 |
| 0.120607 | 0.218007 |
| 0.035525 | 0.162991 |
| 0.18705  | 0.372478 |
| 0.11299  | 0.184612 |
| 0.134788 | 0.224337 |
| 0.119421 | 0.119859 |
| 0.358123 | 0.49824  |
| 0.103856 | 0.168056 |
| 0.244979 | 0.33077  |
| 0.115247 | 0.203173 |
| 0.154072 | 0.265692 |
| 0.14188  | 0.240256 |
| 0.197643 | 0.204565 |
| 0.313507 | 0.575809 |

---

|          |          |
|----------|----------|
| 0.155677 | 0.14272  |
| 0.198349 | 0.290638 |
| 0.19668  | 0.30869  |
| 0.261558 | 0.301686 |
| 0.283822 | 0.280422 |
| 0.140958 | 0.536407 |
| 0.3855   | 0.736027 |
| 0.302966 | 0.437711 |
| 0.228412 | 0.417132 |
| 0.246119 | 0.578429 |
| 0.143475 | 0.05651  |
| 0.524572 | 0.742941 |
| 0.226769 | 0.596238 |
| 0.146769 | 0.461829 |
| 0.178    | 0.398713 |
| 0.154861 | 0.357078 |
| 0.267373 | 0.347199 |
| 0.615157 | 0.720752 |
| 0.325735 | 0.469155 |
| 0.535509 | 0.728547 |
| 0.607197 | 0.670223 |
| 0.351102 | 0.658105 |
| 0.340464 | 0.416898 |
| 0.192791 | 0.029187 |
| 0.023108 | 0.045445 |
| 0.015623 | 0.035831 |
| 0.321394 | 0.529831 |
| 0.475251 | 0.736571 |
| 0.240055 | 0.259574 |
| 0.176538 | 0.281486 |
| 0.123795 | 0.144617 |
| 0.462741 | 0.686936 |
| 0.13623  | 0.228129 |
| 0.230922 | 0.501796 |
| 0.174646 | 0.181009 |
| 0.177354 | 0.240868 |
| 0.178796 | 0.222414 |
| 0.12677  | 0.208805 |
| 0.249448 | 0.334583 |
| 0.271836 | 0.327218 |
| 0.250165 | 0.428985 |
| 0.166509 | 0.148778 |

---

|          |          |
|----------|----------|
| 0.249105 | 0.435451 |
| 0.171069 | 0.28323  |
| 0.156291 | 0.21485  |
| 0.051773 | 0.307126 |
| 0.271465 | 0.591433 |
| 0.274265 | 0.617702 |
| 0.232098 | 0.599271 |
| 0.096996 | 0.172965 |
| 0.047065 | 0.138489 |
| 0.127681 | 0.191397 |
| 0.022924 | 0.101644 |
| 0.147541 | 0.253835 |
| 0.009818 | 0.14474  |

3. As a final comment, the language in the paper needs to be checked, since the paper has a few grammatical errors.

**Answer:**

Thanks for the suggestion. We have checked and revised all the grammar and wording issues throughout the manuscript.

We appreciate for Editors/Reviewers' careful and thoughtful appraisal of our work and for the many helpful suggestions. We hope that the corrections in response to your feedback will meet with approval.

---

## References

Cao, D., Ma, Y., Sun, L., and Gao, L.: Fast observation simulation method based on XGBoost for visible bands over the ocean surface under clear-sky conditions, *Remote Sensing Letters*, 12, 674-683, 10.1080/2150704X.2021.1925371, 2021.

Gade, K.: A Non-singular Horizontal Position Representation, *Journal of Navigation*, 63, 395-417, 10.1017/S0373463309990415, 2010.

Gregor, L., Kok, S., and Monteiro, P. M. S.: Empirical methods for the estimation of Southern Ocean CO<sub>2</sub>: support vector and random forest regression, *Biogeosciences*, 14, 5551-5569, 10.5194/bg-14-5551-2017, 2017.

Ivatt, P. D., and Evans, M. J.: Improving the prediction of an atmospheric chemistry transport model using gradient-boosted regression trees, *Atmos. Chem. Phys.*, 20, 8063-8082, 10.5194/acp-20-8063-2020, 2020.

Li, S., Sarwar, G., Zhao, J., Zhang, Y., Zhou, S., Chen, Y., Yang, G., and Saiz-Lopez, A.: Modeling the Impact of Marine DMS Emissions on Summertime Air Quality Over the Coastal East China Seas, *Earth and Space Science*, 7, e2020EA001220, <https://doi.org/10.1029/2020EA001220>, 2020.

Lundberg, S. M., Erion, G., Chen, H., DeGrave, A., Prutkin, J. M., Nair, B., Katz, R., Himmelfarb, J., Bansal, N., and Lee, S.-I.: From local explanations to global understanding with explainable AI for trees, *Nature Machine Intelligence*, 2, 56-67, 10.1038/s42256-019-0138-9, 2020.

Pan, B.: Application of XGBoost algorithm in hourly PM<sub>2.5</sub> concentration prediction, *IOP Conference Series: Earth and Environmental Science*, 113, 012127, 10.1088/1755-1315/113/1/012127, 2018.

Qian, Q. F., Jia, X. J., and Lin, H.: Machine Learning Models for the Seasonal Forecast of Winter Surface Air Temperature in North America, *Earth and Space Science*, 7, e2020EA001140, <https://doi.org/10.1029/2020EA001140>, 2020.

Shwartz-Ziv, R., and Armon, A.: Tabular data: Deep learning is not all you need, *Information Fusion*, 81, 84-90, <https://doi.org/10.1016/j.inffus.2021.11.011>, 2022.

Silva, S. J., Keller, C. A., and Hardin, J.: Using an Explainable Machine Learning Approach to Characterize Earth System Model Errors: Application of SHAP Analysis to Modeling Lightning Flash Occurrence, *Journal of Advances in Modeling Earth Systems*, 14, e2021MS002881, <https://doi.org/10.1029/2021MS002881>, 2022.

Stirnberg, R., Cermak, J., Kotthaus, S., Haeffelin, M., Andersen, H., Fuchs, J., Kim, M., Petit, J. E., and Favez, O.: Meteorology-driven variability of air pollution (PM<sub>1</sub>) revealed with explainable machine learning, *Atmos. Chem. Phys.*, 21, 3919-3948, 10.5194/acp-21-3919-2021, 2021.

Sun, Y., Yin, H., Lu, X., Notholt, J., Palm, M., Liu, C., Tian, Y., and Zheng, B.: The drivers and health risks of unexpected surface ozone enhancements over the Sichuan Basin, China, in 2020,

---

Atmos. Chem. Phys., 21, 18589-18608, 10.5194/acp-21-18589-2021, 2021.

Wang, W. L., Song, G., Primeau, F., Saltzman, E. S., Bell, T. G., and Moore, J. K.: Global ocean dimethyl sulfide climatology estimated from observations and an artificial neural network, *Biogeosciences*, 17, 5335-5354, 10.5194/bg-17-5335-2020, 2020.

Zamani Joharestani, M., Cao, C., Ni, X., Bashir, B., and Talebiesfandarani, S.: PM2.5 Prediction Based on Random Forest, XGBoost, and Deep Learning Using Multisource Remote Sensing Data, *Atmosphere*, 10, 10.3390/atmos10070373, 2019.

Zhang, R., Li, B., and Jiao, B.: Application of XGboost Algorithm in Bearing Fault Diagnosis, *IOP Conference Series: Materials Science and Engineering*, 490, 072062, 10.1088/1757-899x/490/7/072062, 2019.
